# Supplementary material
Source: PubMed Central journal article supplement (PMC6865224)
Supplement: jama-322-1661-s003.pdf [file jama-322-1661-s003.pdf]

## **Data Sharing Statement**

Alexander. Lefamulin vs Moxifloxacin for Early Clinical Response Among Adults With Community-Acquired Bacterial Pneumonia. *JAMA*. Published September 27, 2019. 10.1001/jama.2019.15468

### **Data**

**Data available:** No
